# Supplementary material for: Electrochemical reactivity and passivation of organic electrolytes at spinel MgCrMnO4 cathode interfaces for rechargeable high voltage magnesium-ion batteries
Source: Royal Society of Chemistry journal article supplement (doi:10.1039/d4ta03765k), 2024-01-01
Supplement: d4ta03765k1.pdf [file d4ta03765k1.pdf]

**Electrochemical Reactivity and Passivation of Organic Electrolytes at spinel MgCrMnO<sub>4</sub>  
Cathode Interface for Rechargeable High Voltage Magnesium-Ion Battery**

Zhenzhen Yang,<sup>a,b,\*</sup> Jiyu Cai,<sup>a</sup> Evelyn Wang,<sup>a,b</sup> Maksim Sultanov,<sup>c,d</sup> Lihong Gao,<sup>b</sup> Xianyang  
Wu,<sup>a</sup> Chen Liao,<sup>a,b</sup> Zonghai Chen<sup>a</sup>, Jianguo Wen,<sup>c</sup> Lynn Trahey,<sup>b</sup> Brian J. Ingram,<sup>a, b, \*</sup>

<sup>a</sup> Chemical Sciences and Engineering Division, Argonne National Laboratory, Lemont,  
Illinois, 60439, USA

<sup>b</sup> Joint Center for Energy Storage Research, Lemont, Illinois, 60439, USA

<sup>c</sup> Center for Nanoscale Materials, Argonne National Laboratory, Lemont, Illinois, 60439, USA

<sup>d</sup> Department of Physics, Northern Illinois University, Dekalb, Illinois, 60115, USA

Corresponding authors: [yangzhzh@anl.gov](mailto:yangzhzh@anl.gov), [ingram@anl.gov](mailto:ingram@anl.gov)

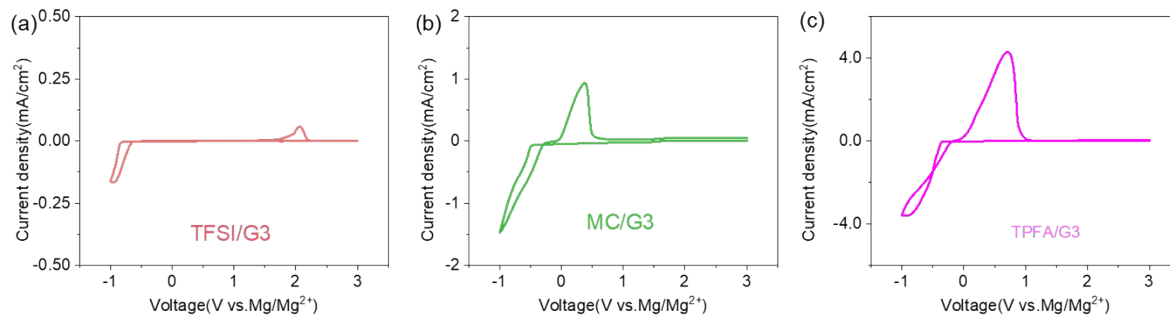

**Figure S1.** Cyclic voltammograms (CV) comparison for different anions in G3 of 0.1 M electrolytes (a): TFSI, (b) TPFA, (c) MC. Note different current scales are used to make the comparisons easier for the readers.

| electrolyte              | TFSI/G3 | TPFA/G3 | MC/G3 | TPFA/G2 | TPFA/MPA |
|--------------------------|---------|---------|-------|---------|----------|
| Coulombic efficiency (%) | 23      | 87      | 74    | 80      | 73       |
| Plating potential (V)    | -0.80   | -0.35   | -0.46 | -0.34   | -0.38    |
| Stripping potential (V)  | 1.48    | -0.10   | -0.04 | 0.10    | -0.03    |
| Over-potential (V)       | 2.28    | 0.25    | 0.42  | 0.44    | 0.35     |

**Table S1.** Summarized Electrochemical properties from Figure 3a-b including CE, onset plating/stripping potentials, and overpotentials for each electrolyte at 0.1M.

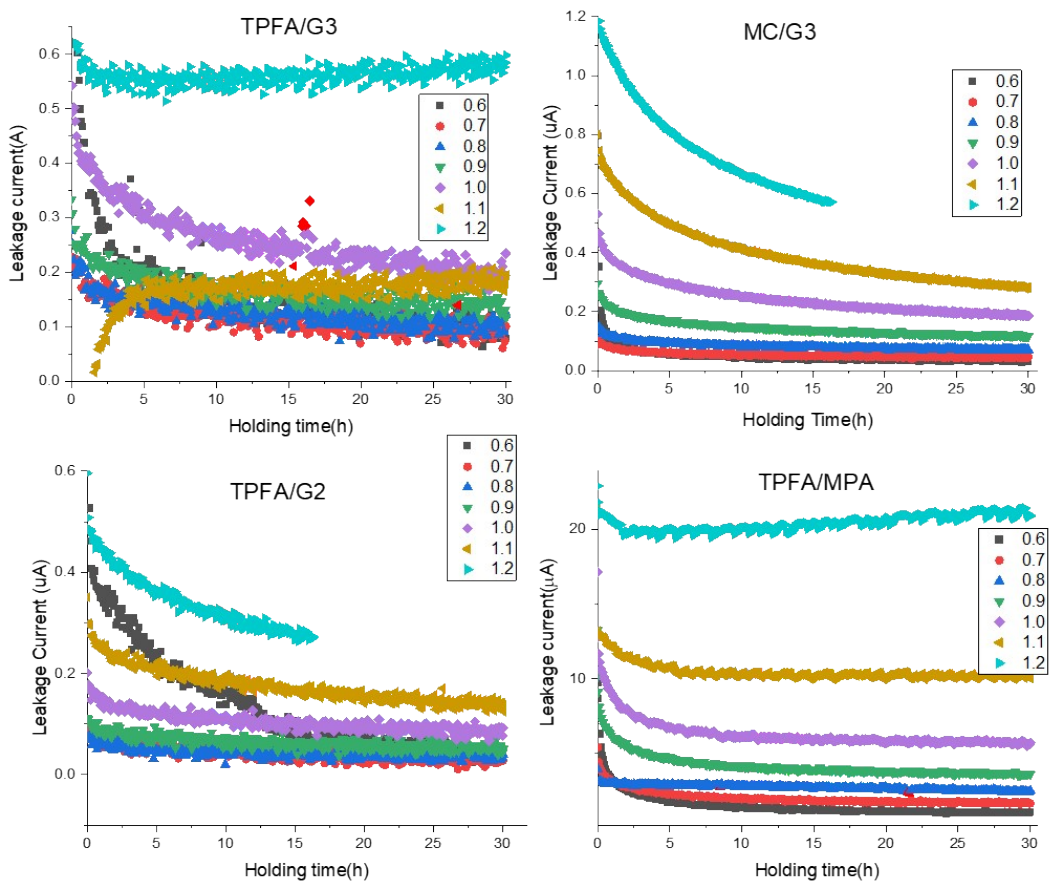

**Figure S2.** Dependence of the steady state leakage current on the working potential in half cells verse carbon cloth for TPFA/G3, MC/G3, TPFA/G2 and TPFA/MPA electrolyte.

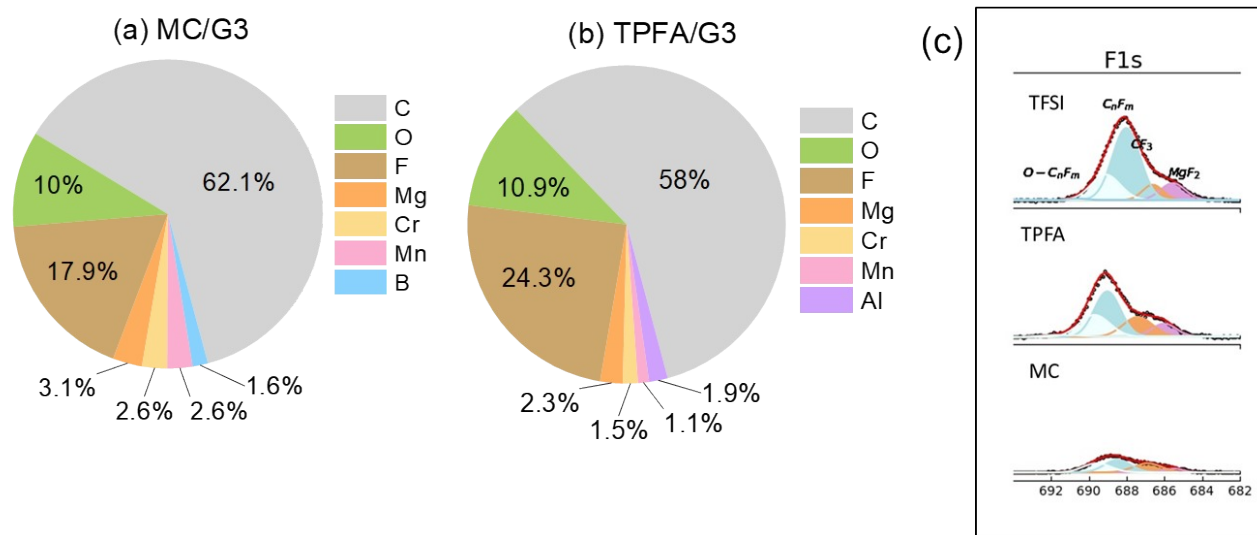

**Figure S3.** Atomic concentration of surface composition quantified by XPS in (a) MC/G3 and (b) TPFA/G3 and (c) F1s spectra in the inner layer of CEI after Ar<sup>+</sup> sputtering.
